# Supplementary material for: Changes Over Time in Glycemic Control, Insulin Sensitivity, and β-Cell Function in Response to Low-Dose Metformin and Thiazolidinedione Combination Therapy in Patients With Impaired Glucose Tolerance
Source: PubMed Central journal article supplement — Diabetes Care. 2011 Jun 17;34(7):1601–4. doi: 10.2337/dc11-0046 (PMC3120173; doi:10.2337/dc11-0046), 2011-06-17
Supplement: supp_34.7.1601v110046_DC110046SupplementaryData.pdf [file supp_34.7.1601v110046_DC110046SupplementaryData.pdf]

**Supplementary Table 1: Demographic, clinical and metabolic characteristics at baseline**

|                            | <b>Placebo</b>     | <b>Rosiglitazone/Metformin</b> |          |
|----------------------------|--------------------|--------------------------------|----------|
|                            | <b>(n=104)</b>     | <b>(n=103)</b>                 | <b>P</b> |
| Age (yrs)                  | 55.0 [46.0-61.0]   | 50.0 [44.0-61.0]               | 0.1653   |
| Female                     | 71 (68.3)          | 67 (65.0)                      | 0.6231   |
| Ethnicity:                 |                    |                                | 0.9729   |
| Caucasian                  | 77 (74.0)          | 77 (74.8)                      |          |
| South Asian                | 7 (6.8)            | 8 (7.8)                        |          |
| Latino                     | 7 (6.7)            | 7 (6.8)                        |          |
| Others                     | 13 (12.5)          | 11 (10.7)                      |          |
| Family history of DM       | 75 (72.8)          | 73 (73.0)                      | 0.9764   |
| BMI (kg/m <sup>2</sup> )   | 32.0 [28.3-36.8]   | 31.3 [27.1-35.7]               | 0.5649   |
| Waist circumference (cm)   | 103.0 [94.6-116.4] | 104.3 [93.5-113.6]             | 0.6958   |
| Smoking:                   |                    |                                | 0.5364   |
| Never                      | 63 (60.6)          | 62 (60.2)                      |          |
| Remote                     | 31 (29.8)          | 35 (34.0)                      |          |
| Current                    | 10 (9.6)           | 6 (5.8)                        |          |
| Lipids:                    |                    |                                |          |
| Total cholesterol (mmol/L) | 5.40 [4.80-6.10]   | 4.90 [4.20-5.60]               | 0.0002   |
| LDL cholesterol (mmol/L)   | 3.40 [2.90-4.00]   | 2.90 [2.30-3.60]               | 0.0003   |
| HDL cholesterol (mmol/L)   | 1.10 [1.00-1.40]   | 1.10 [0.90-1.30]               | 0.2832   |
| Triglycerides (mmol/L)     | 1.66 [1.16-2.22]   | 1.70 [1.17-2.21]               | 0.9200   |
| IS <sub>OGTT</sub>         | 3.0 [2.2-5.5]      | 2.9 [1.9-4.5]                  | 0.2922   |

SUPPLEMENTARY DATA

|                              |                |                |        |
|------------------------------|----------------|----------------|--------|
|                              |                |                |        |
| ISSI-2                       | 490 [384-564]  | 499 [408-603]  | 0.4095 |
| Oral glucose tolerance test: |                |                |        |
| Fasting glucose (mmol/L)     | 5.4 [5.0-5.9]  | 5.4 [5.0-5.8]  | 0.8544 |
| 30-mins glucose(mmol/L)      | 9.8 [8.9-10.8] | 9.2 [8.3-10.4] | 0.0572 |
| 2-hour glucose (mmol/L)      | 8.8 [8.2-9.9]  | 8.9 [8.2-9.8]  | 0.9435 |
| Glucose tolerance status:    |                |                | 0.3149 |
| Isolated IGT                 | 88 (84.6)      | 92 (89.3)      |        |
| Combined IGTand IFG          | 16 (15.4)      | 11 (10.7)      |        |

Categorical data are presented as n(%) and continuous variables are presented as median followed by interquartile range.

p-values for continuous variables were obtained by wilcoxon rank-sum test.

p-values for categorical variables were obtained by chi-squared test or fisher's exact test, where necessary.
